# Supplementary material
Source: PubMed Central journal article supplement (PMC3618605)

## Supplementary Figure S1

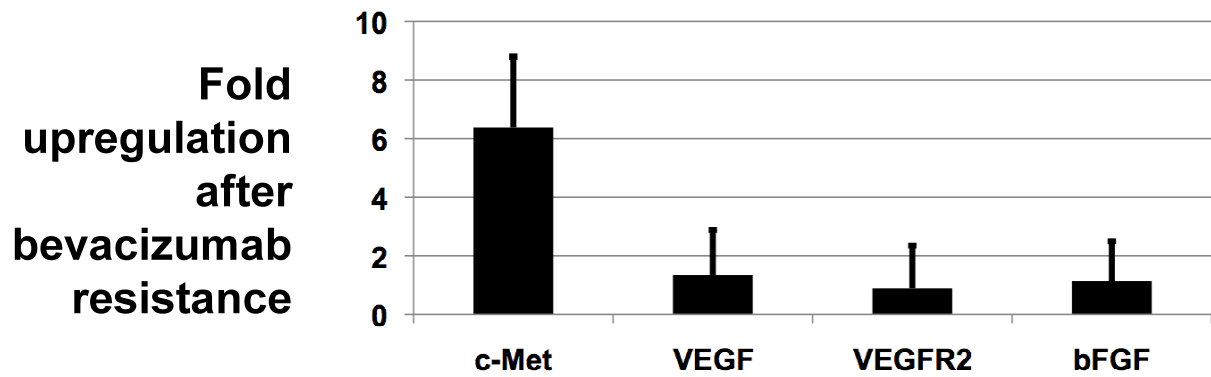

## Supplementary Figure S2

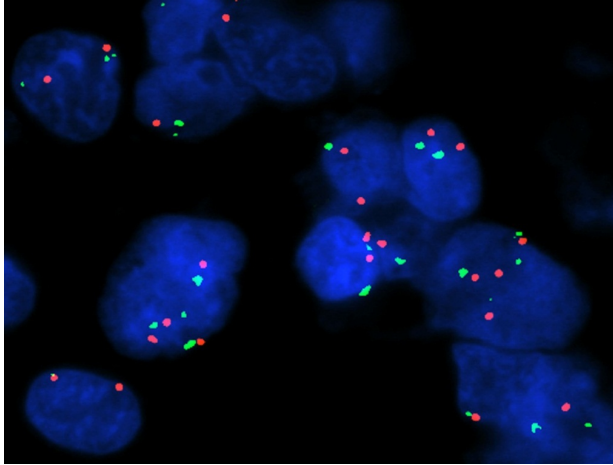

**Polysomy 7**

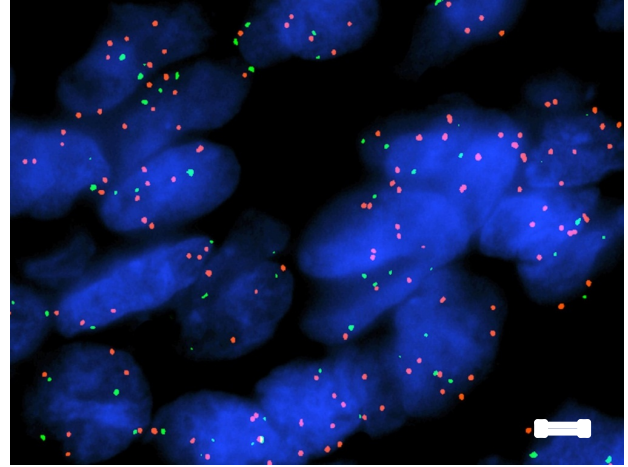

**c-Met amplification**  
(seen in only one of 20 cases)

# Supplementary Figure S3

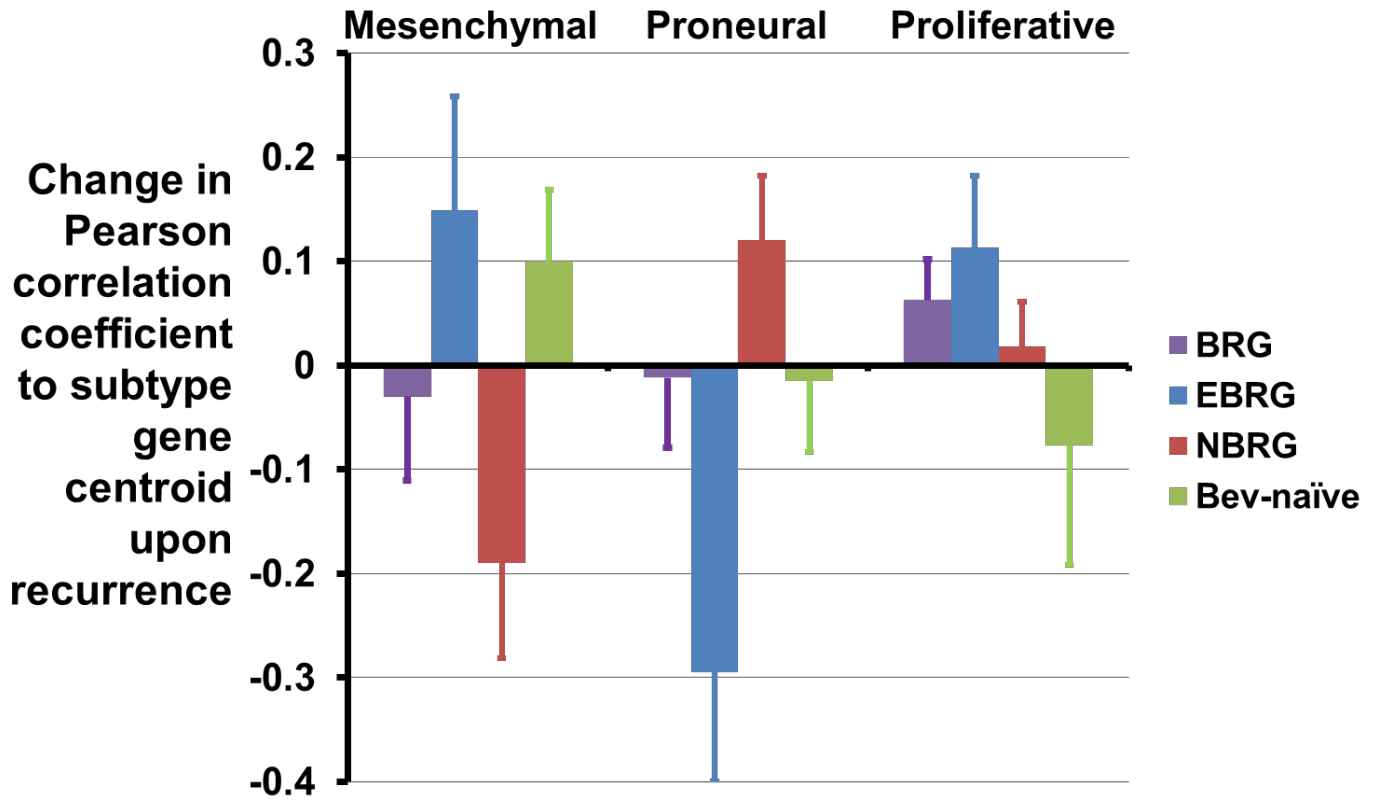

# Supplementary Figure S4

## A

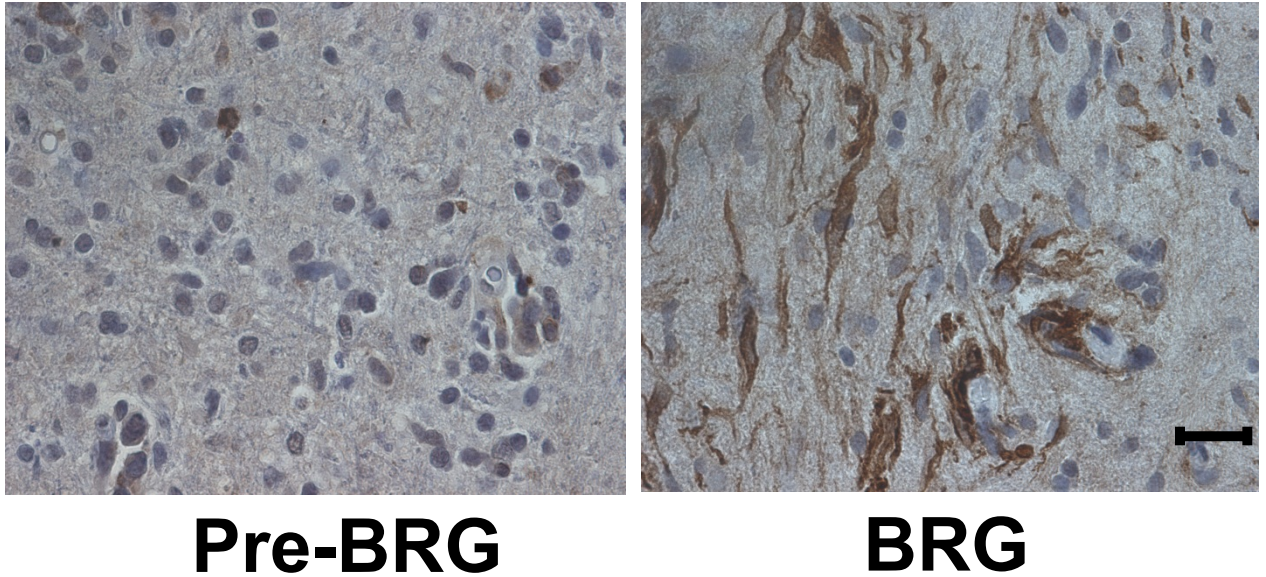

## B

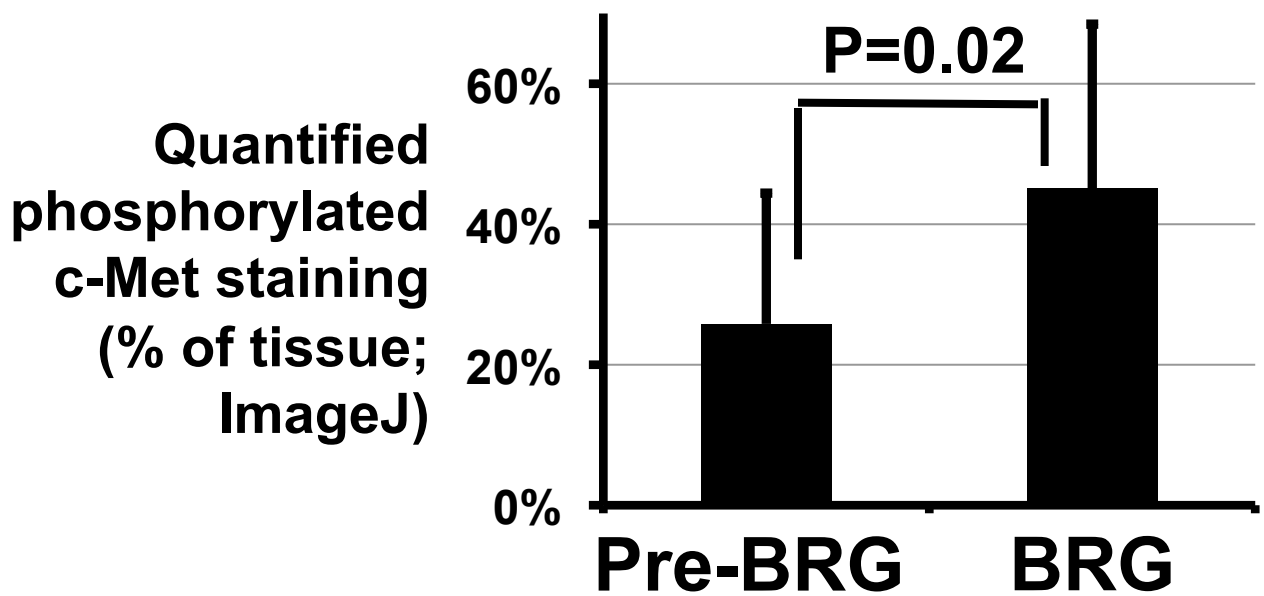

## Supplementary Figure S5

### A

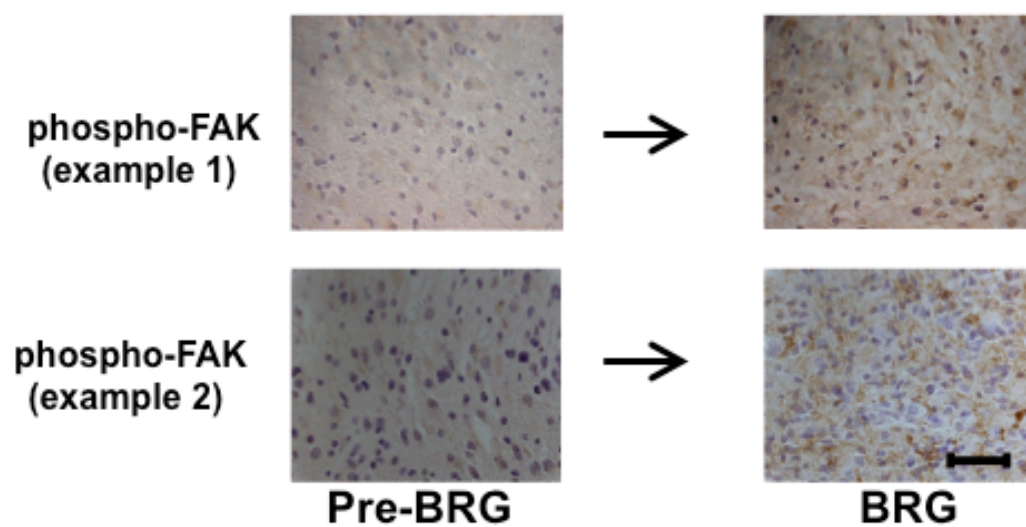

### B

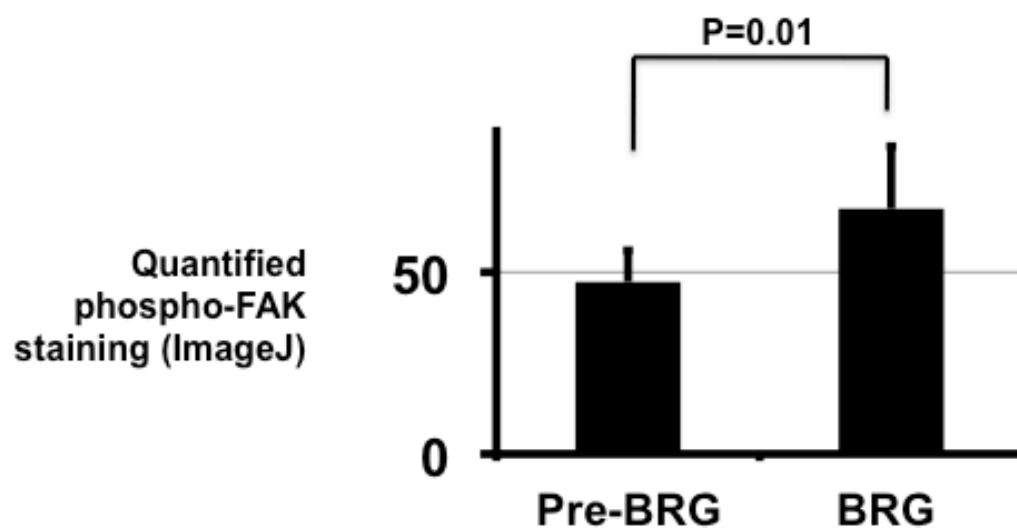

## Supplementary Figure S6

**A**

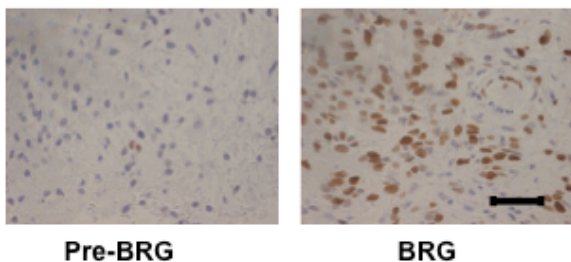

**B**

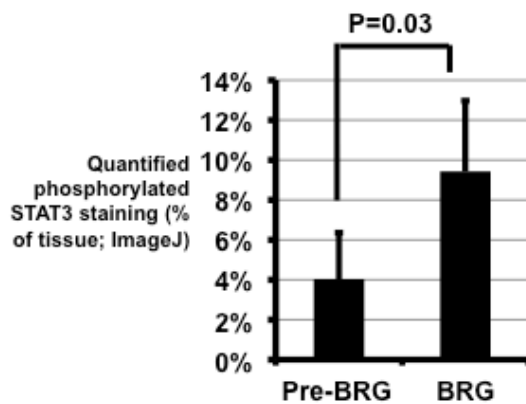

**C**

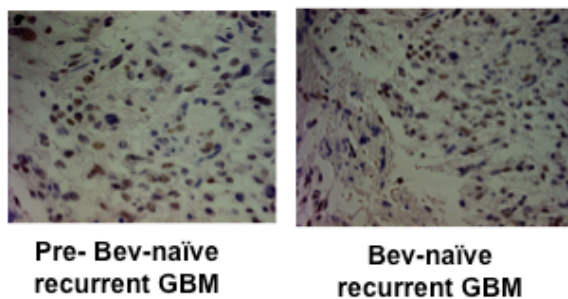

**D**

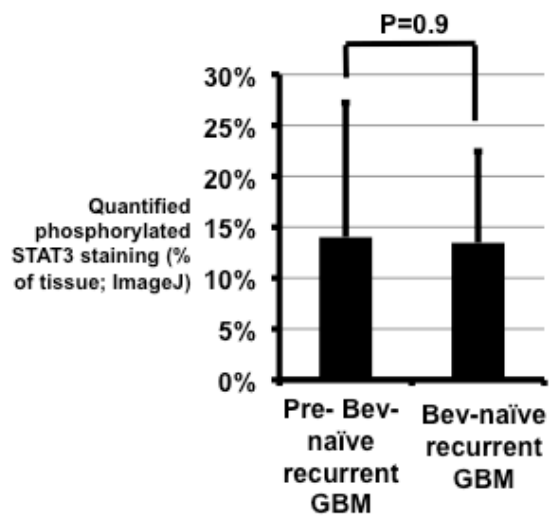

# Supplementary Figure S7

## A

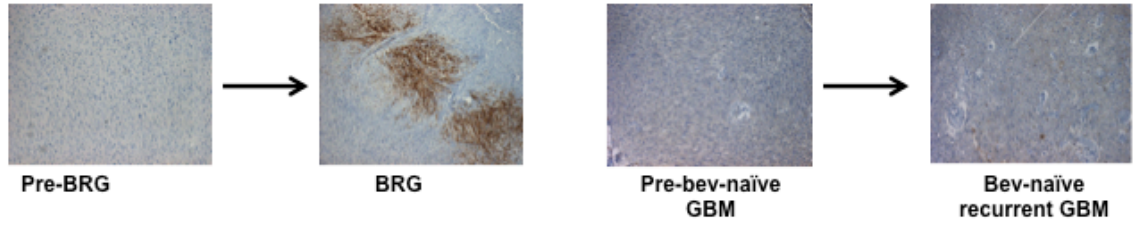

## B

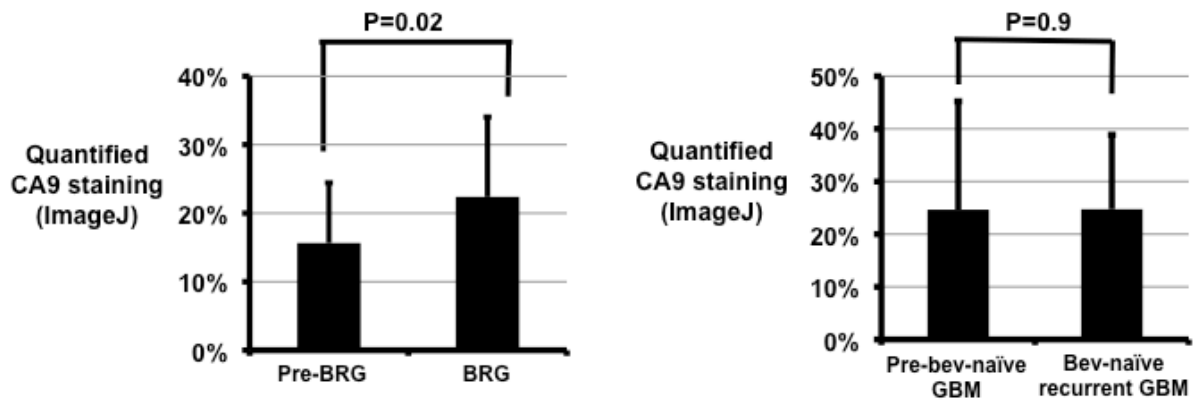

## Supplementary Figure S8

### A

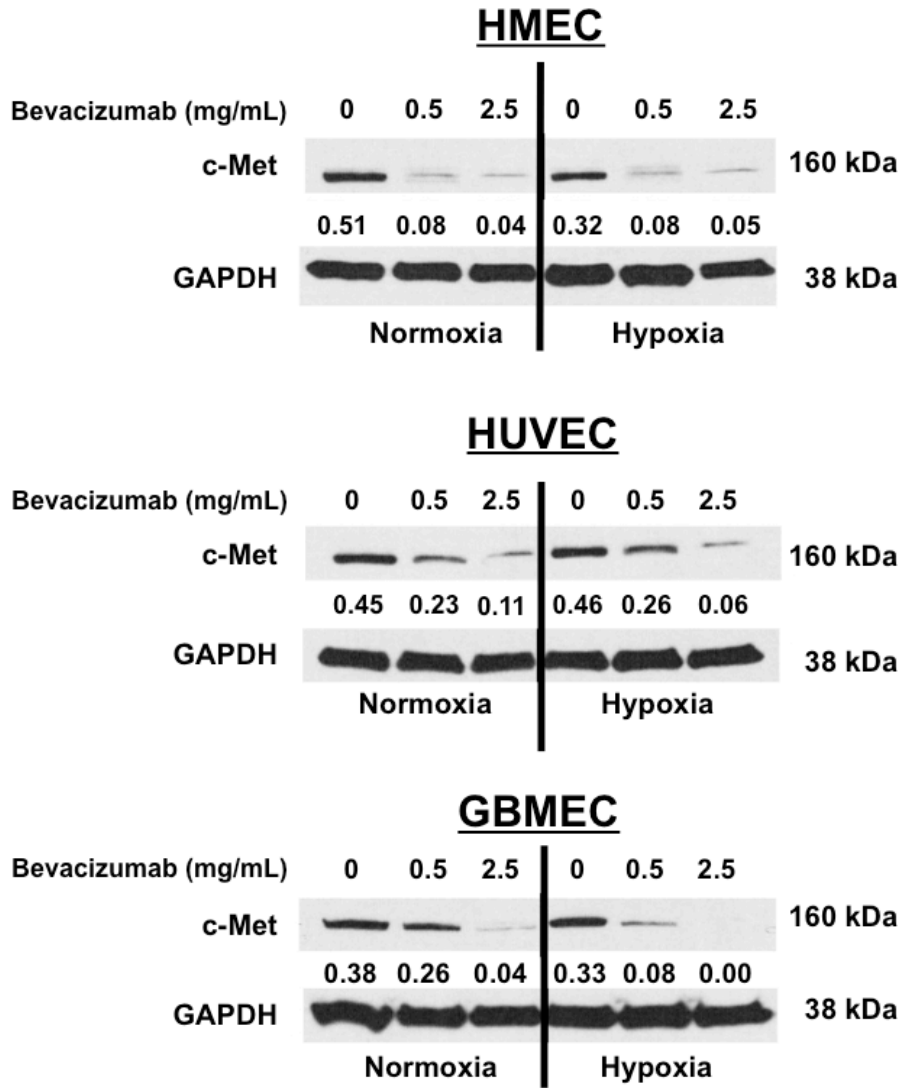

### B

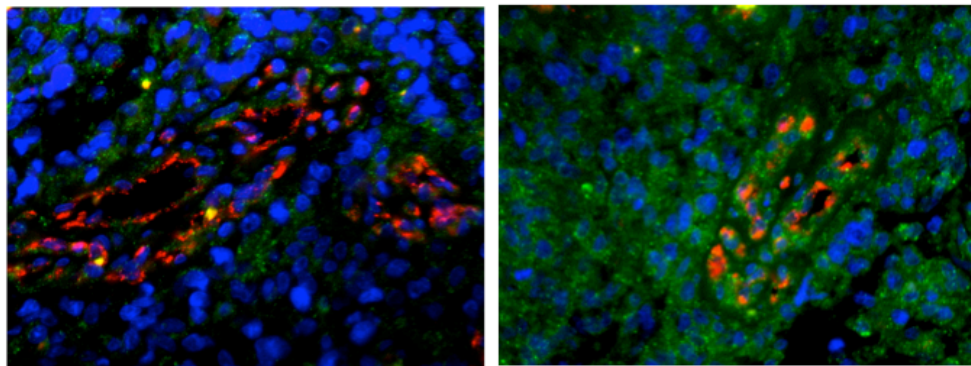

Pre-BRG

BRG



# Supplementary Figure S9

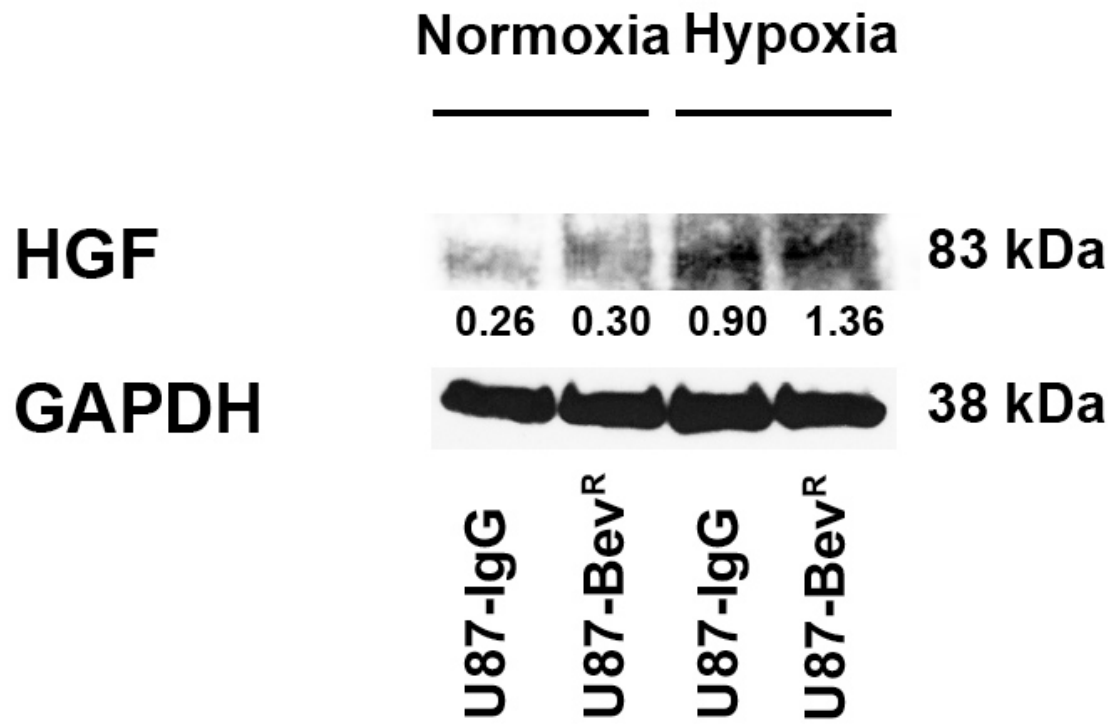

## Supplementary Figure S10

SF7796=BRG-derived

SF8106=BRG-derived

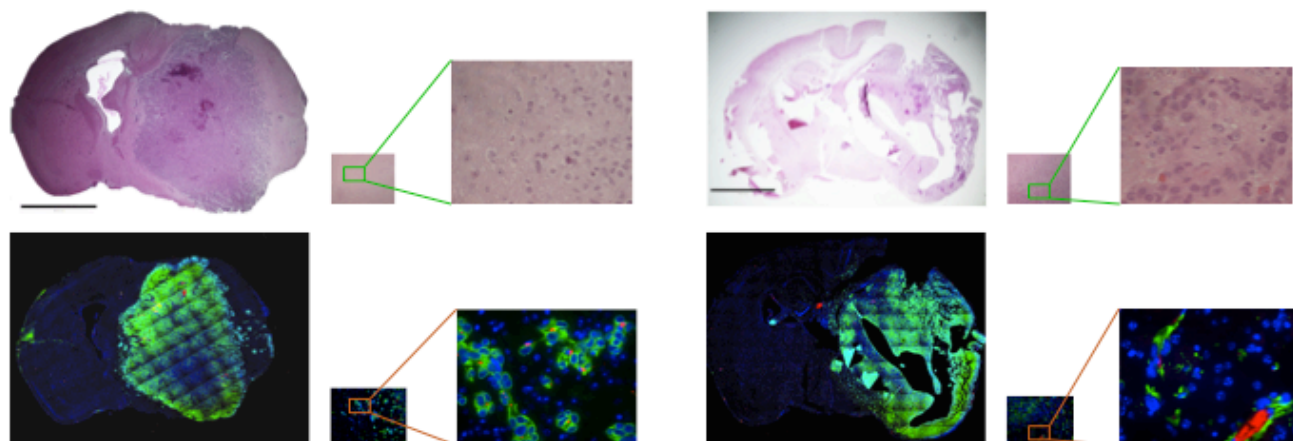

SF8244=acquired from bev-naïve GBM but proved to be bev-resistant

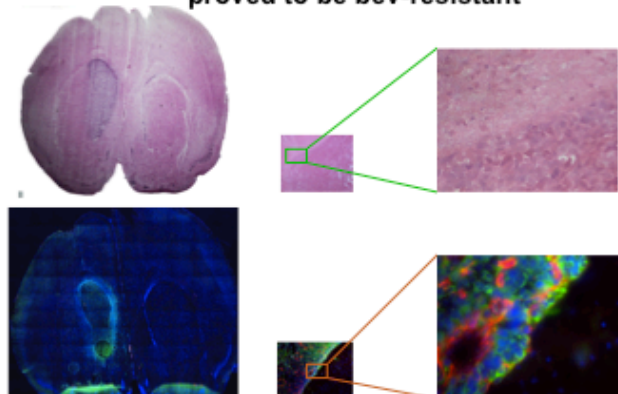

# Supplementary Figure S11

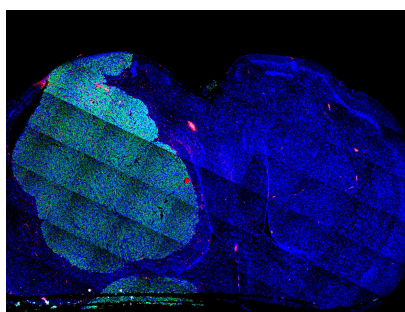

**SF8557**

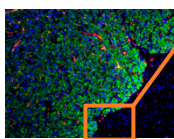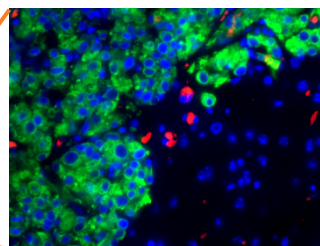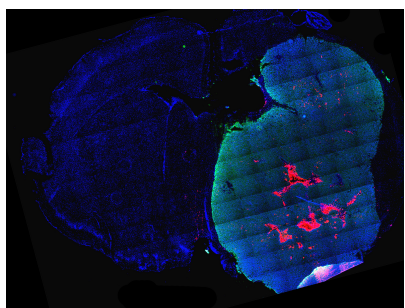

**SF7300**

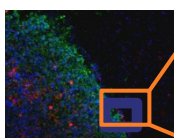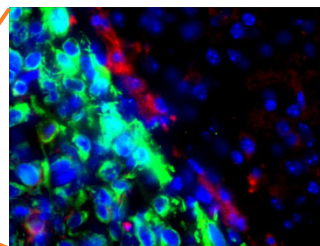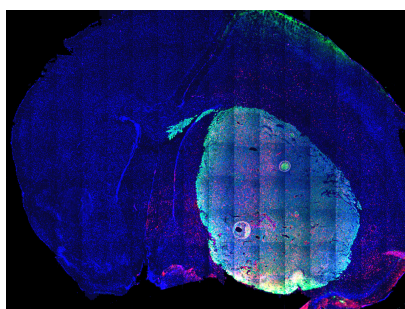

**SF7227**

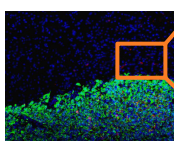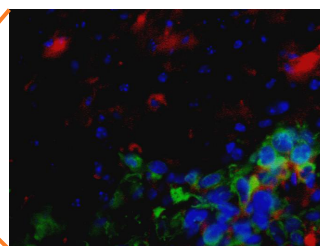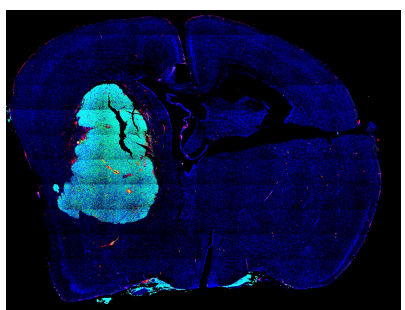

**GBM43**

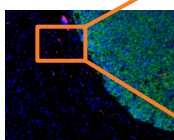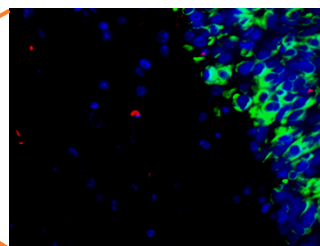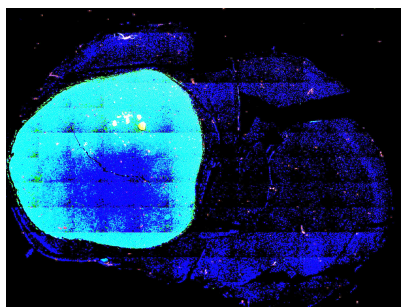

**GBM6**

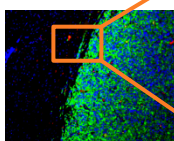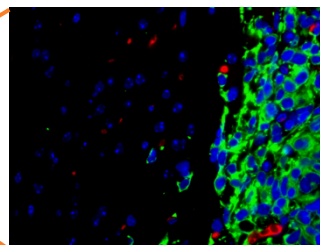

# Supplementary Figure S12

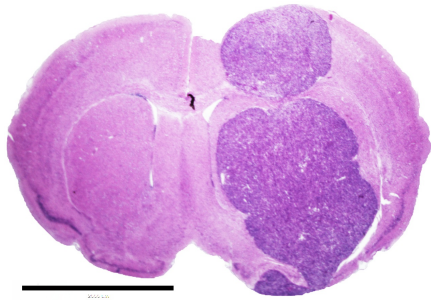

**SF8557**

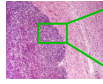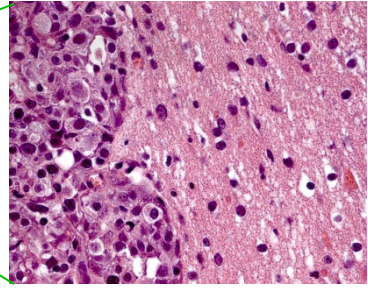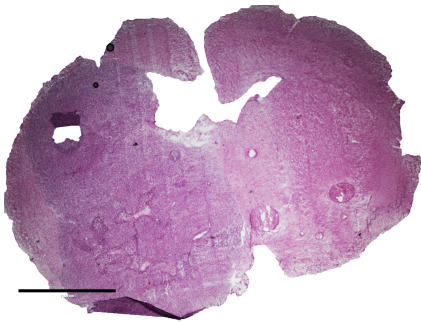

**SF7300**

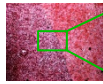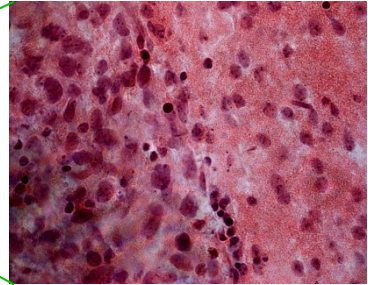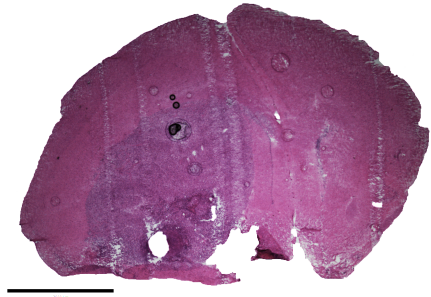

**SF7227**

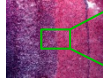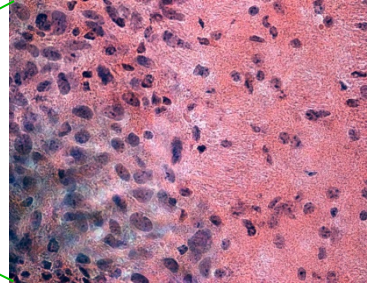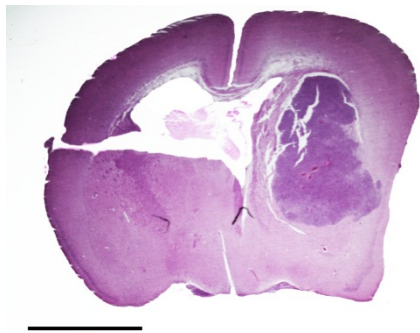

**GBM43**

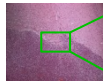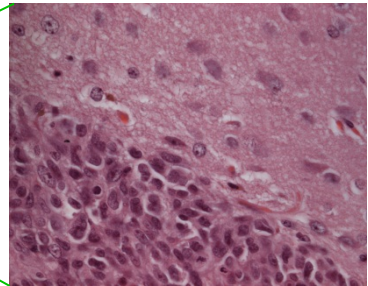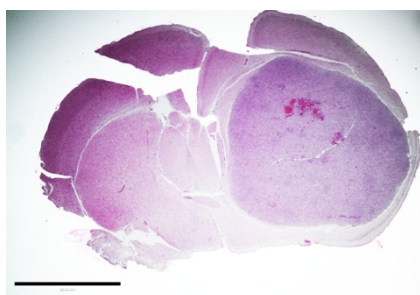

**GBM6**

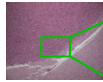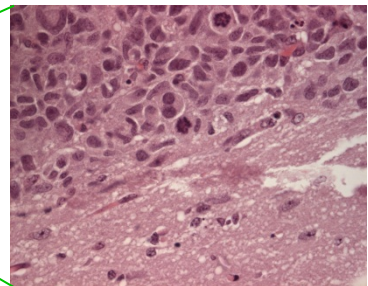

# Supplementary Figure S13

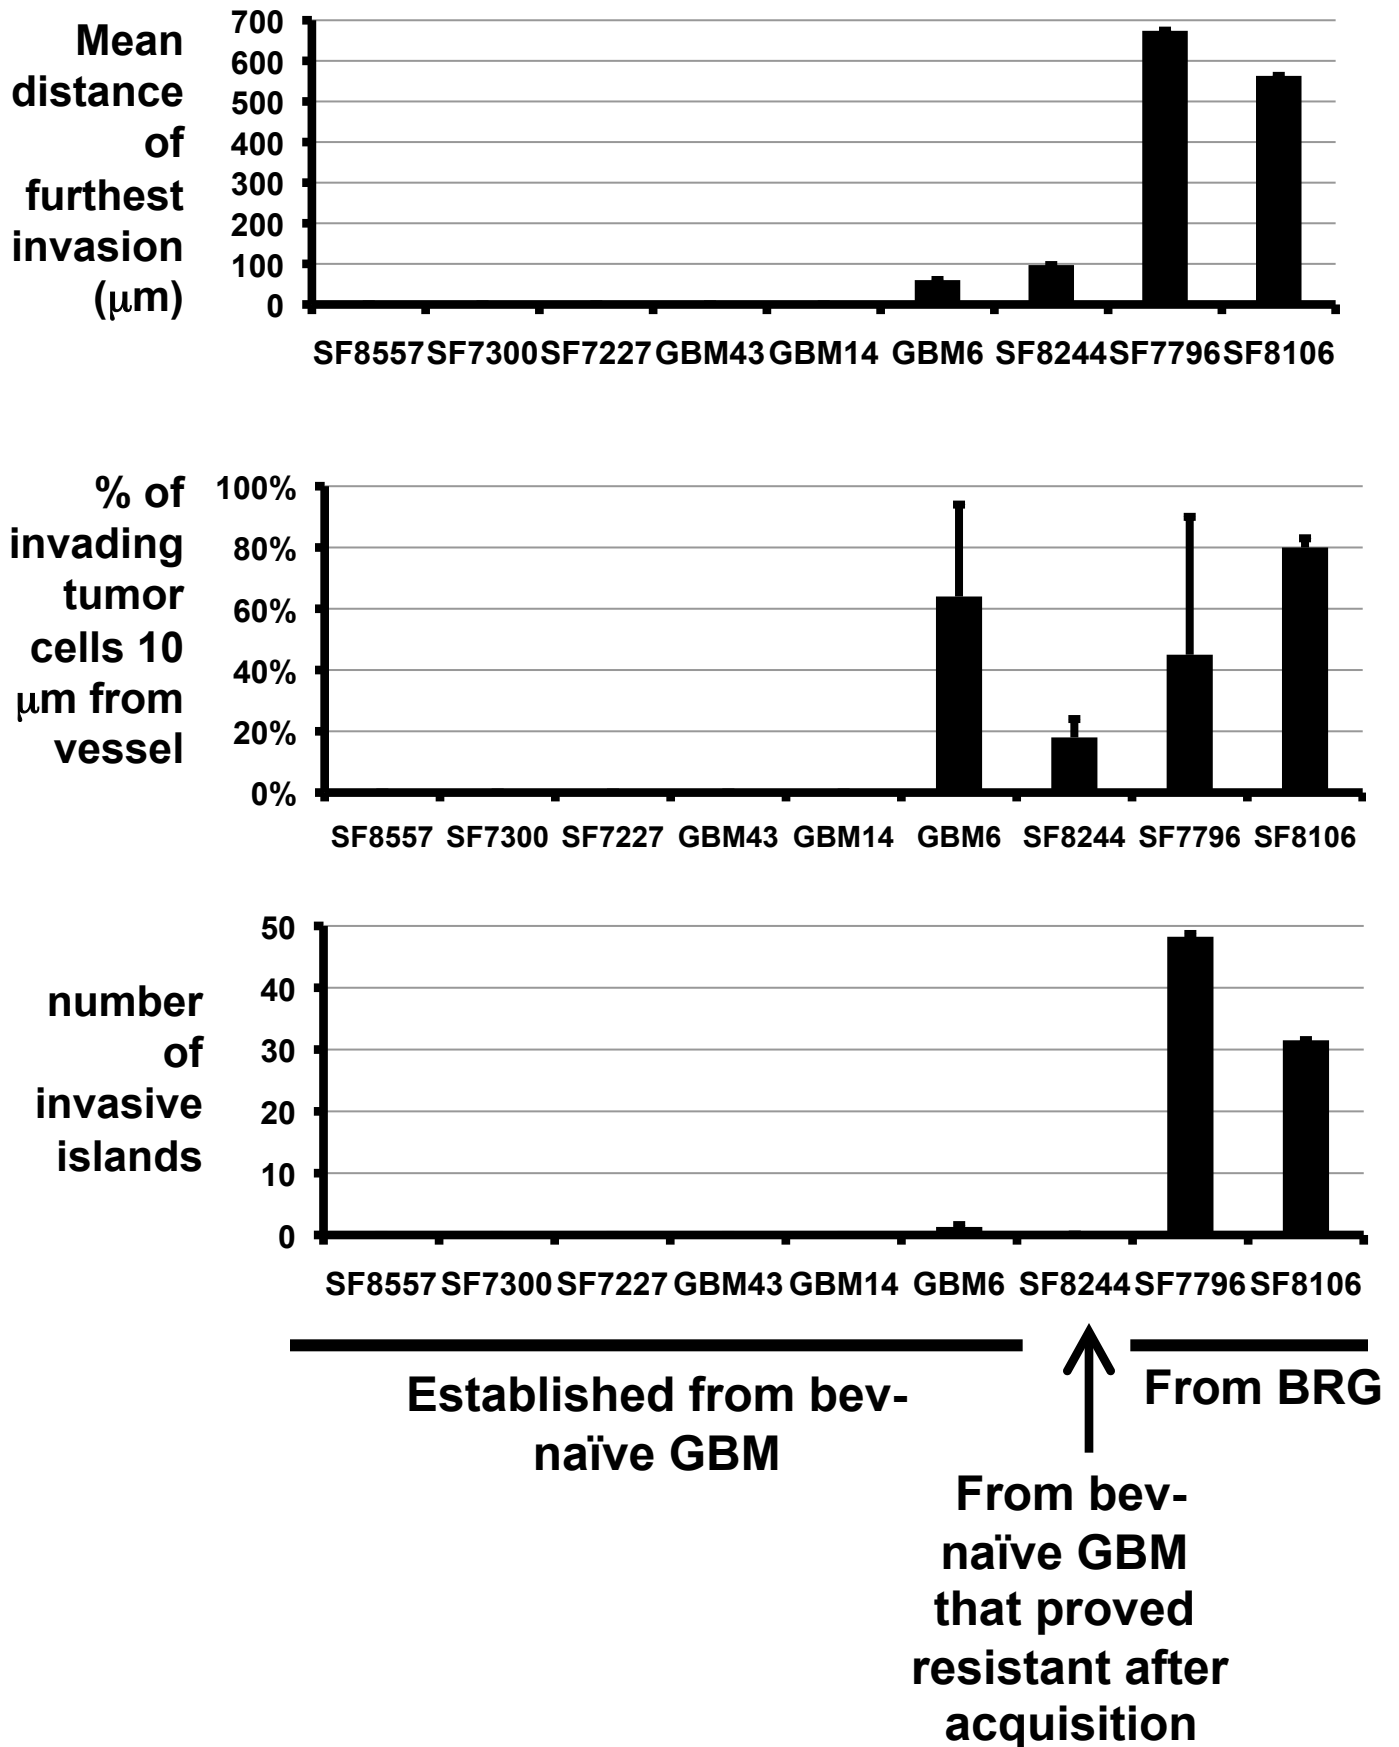

# Supplementary Figure S14

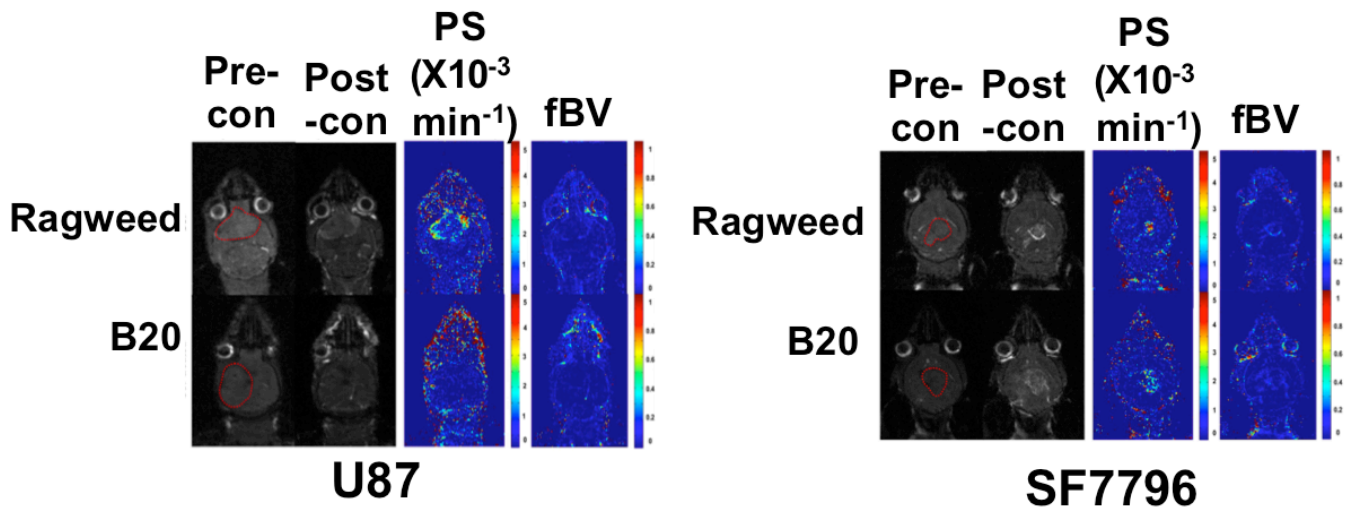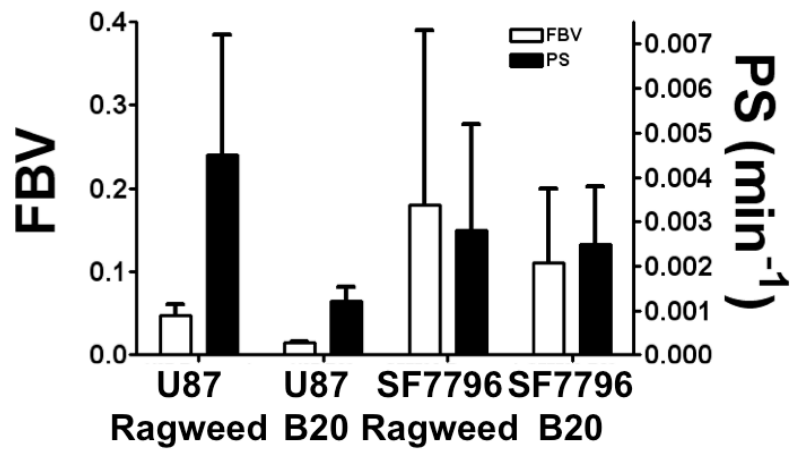

# Supplementary Figure S15

## A

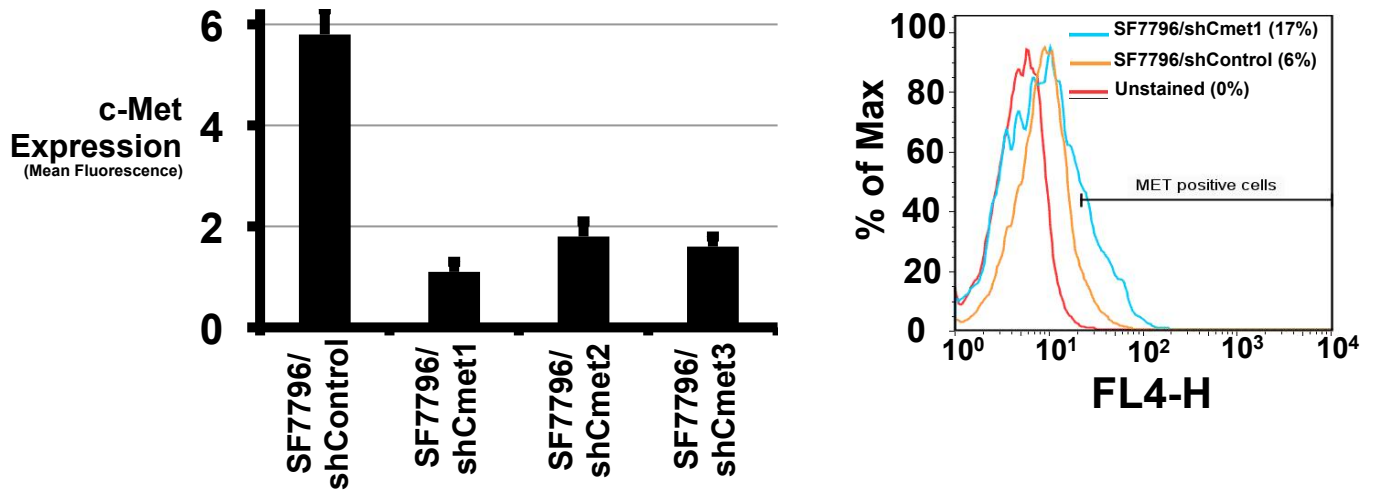

## B

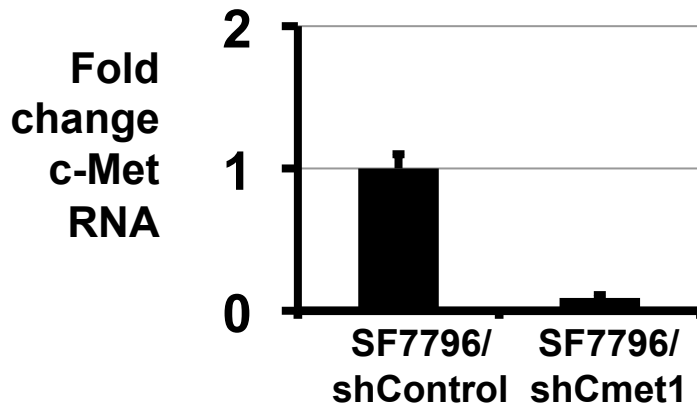

## C

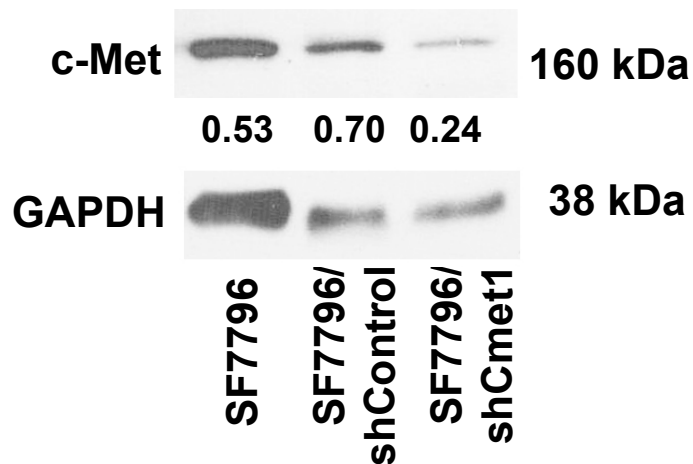

# Supplementary Figure S16

## A

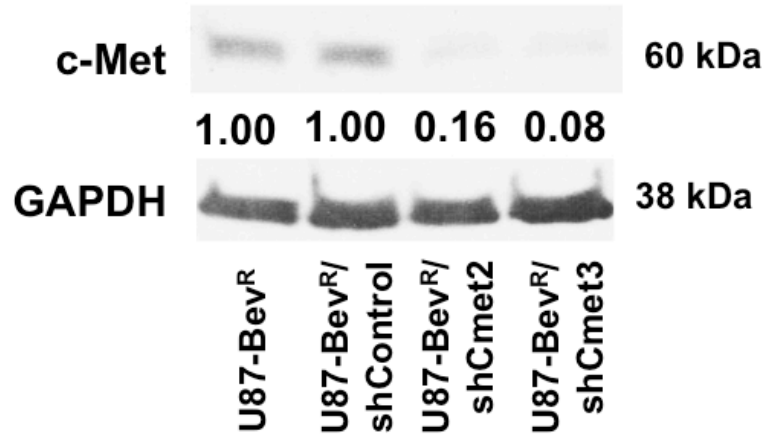

## B

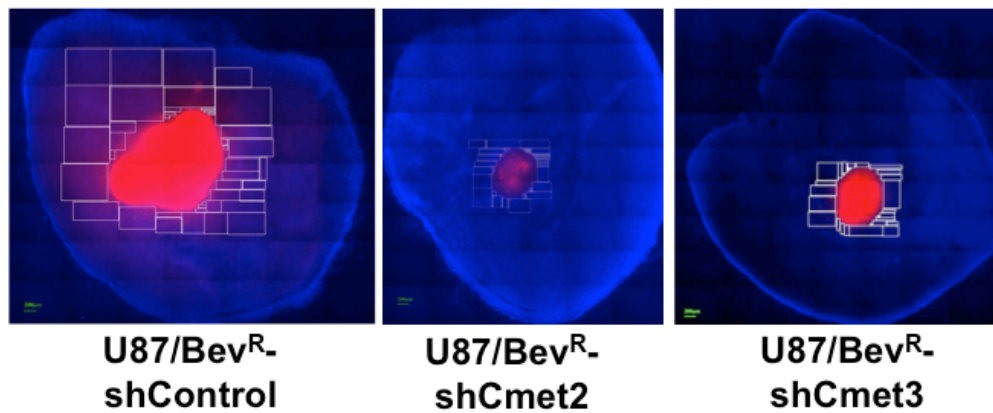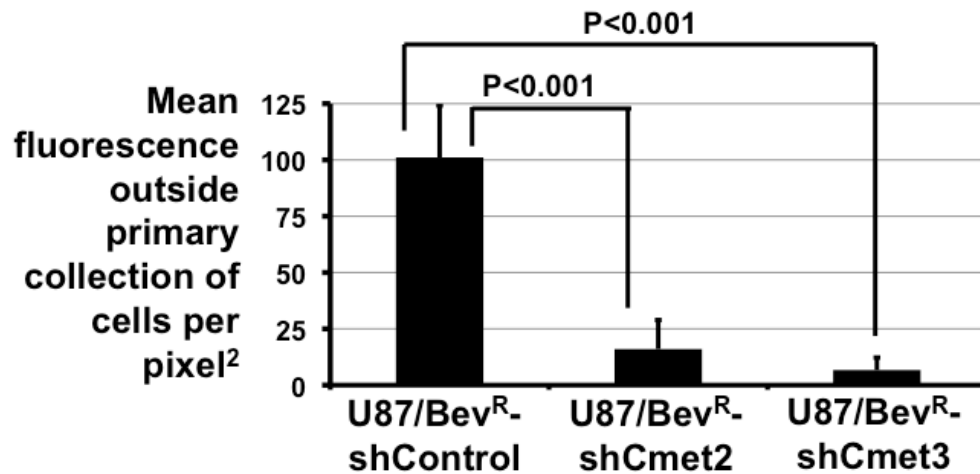



## Supplementary Figure S17

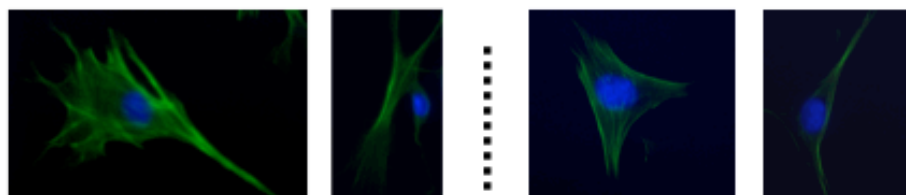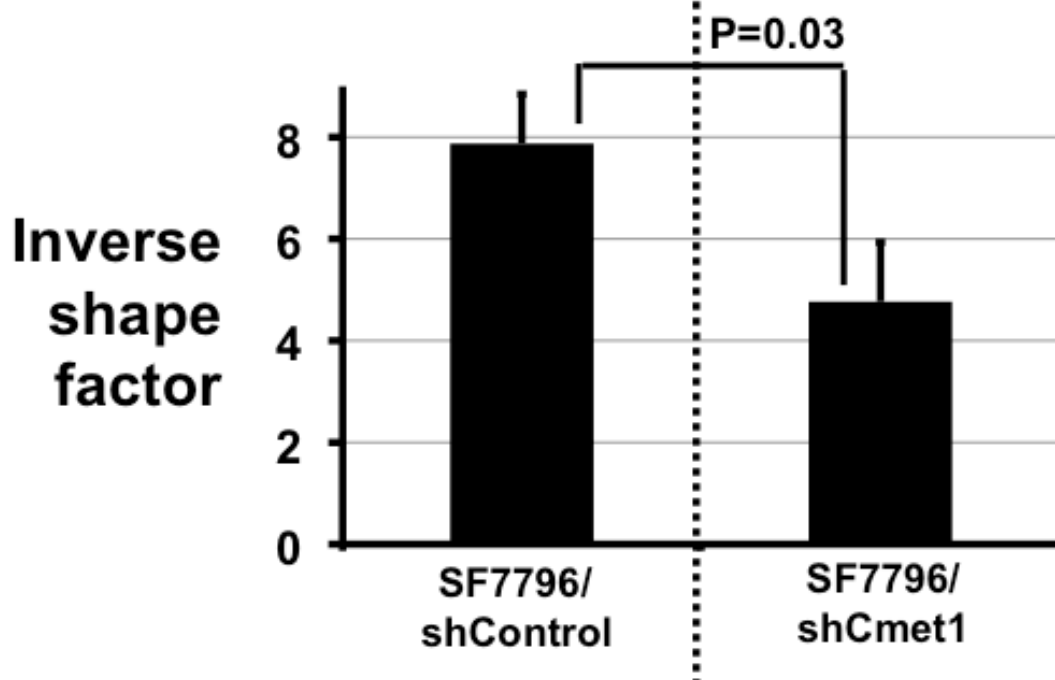

# Supplementary Figure S18

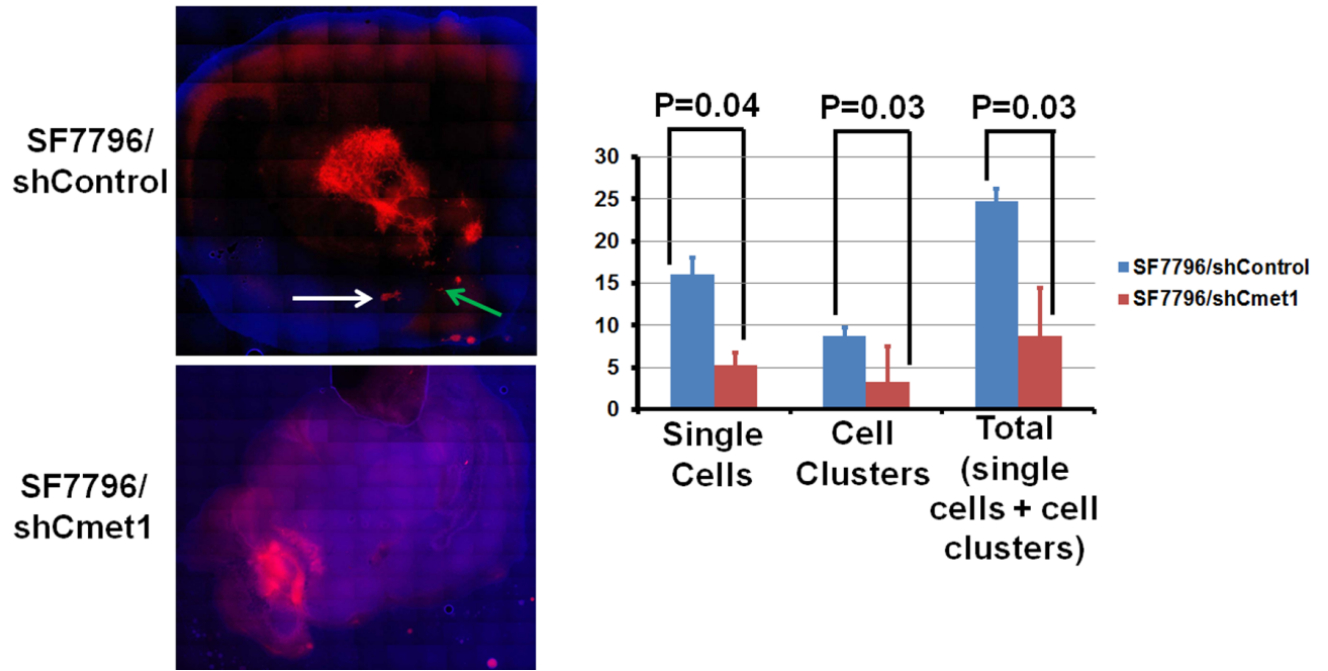

## Supplementary Figure S19

SF7796/shControl

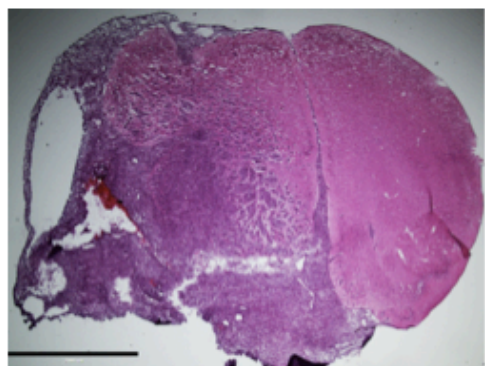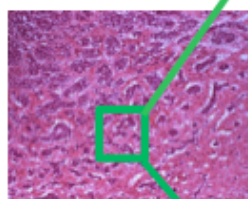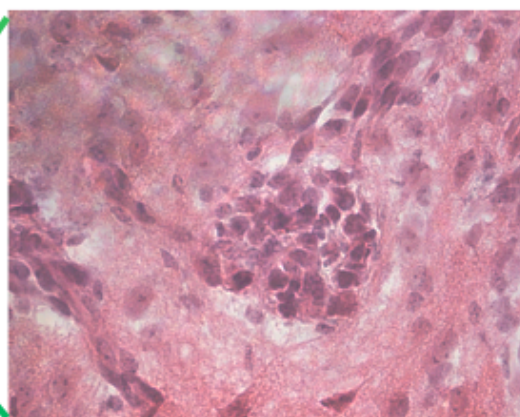

SF7796/shCmet1

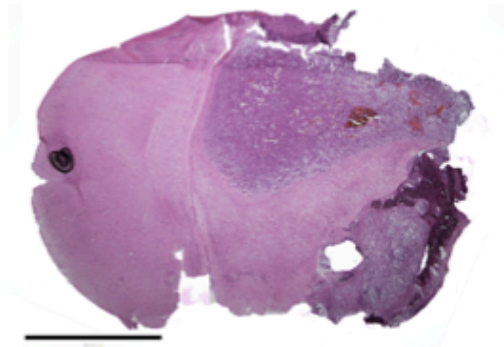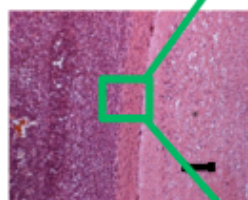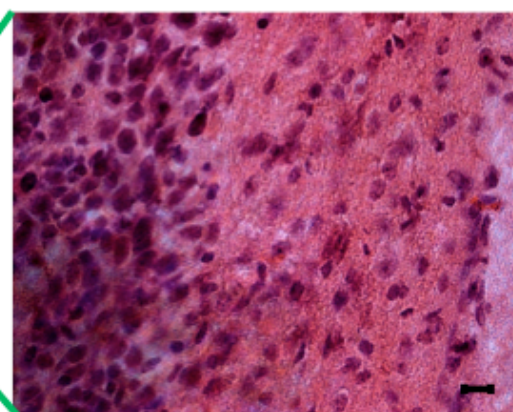

## Supplementary Figure S20

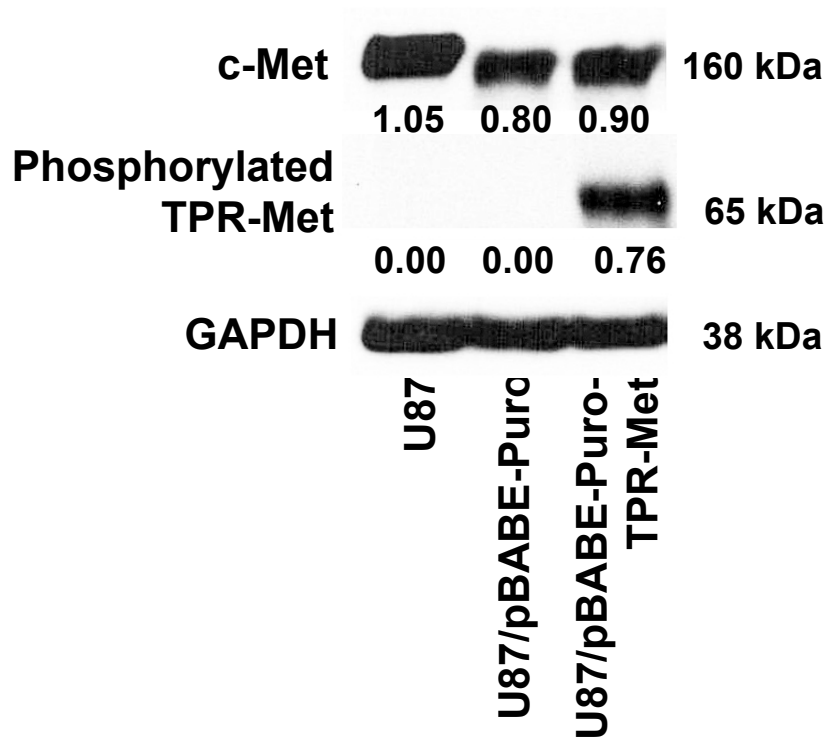

Supplement: NIHMS434955-supplement-3.pdf [file NIHMS434955-supplement-3.pdf]
